# Supplementary material
Source: Copernicus journal article supplement (doi:10.5194/egusphere-2026-2275)
Supplement: Supplementary file 1 [file egusphere-2026-2275-supplement.pdf]

*Supplement of*

**Quantifying key parameter sensitivities for water table depth in hydrological schemes of CoLM-PSUADE**

Tingting Wu, Shupeng Zhang, Xiaofan Yang, and Yongjiu Dai

5 *Correspondence to: Xiaofan Yang (xfyang@bnu.edu.cn)*

# S1: Results of qualitative sensitivity analysis

## S1.1 Qualitative screening results

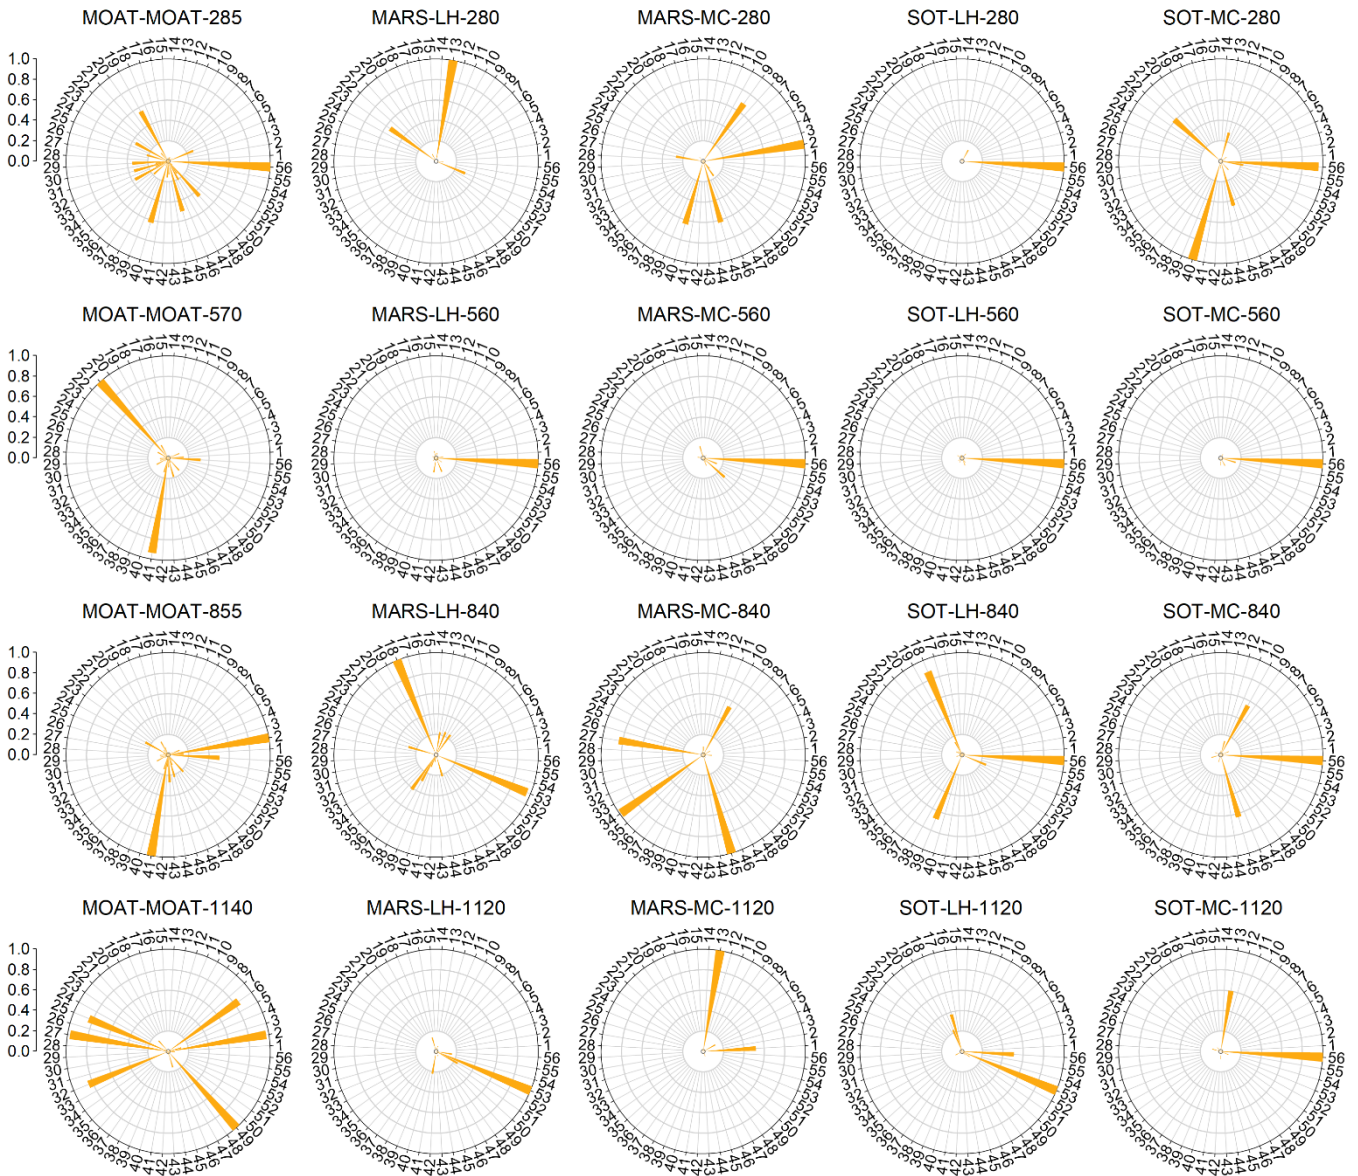

10 Figure S1: Qualitative sensitivity analysis results based on the *MAE* objective function. The numbers on the outer ring represent parameter indices (refer to Table 2 for the corresponding parameter definitions). The length of each pointer indicates the normalized sensitivity index, ranging from 0 to 1, with longer pointers denoting higher sensitivity. Each subplot title follows the format “sensitivity analysis method-sampling technique-sample size”.

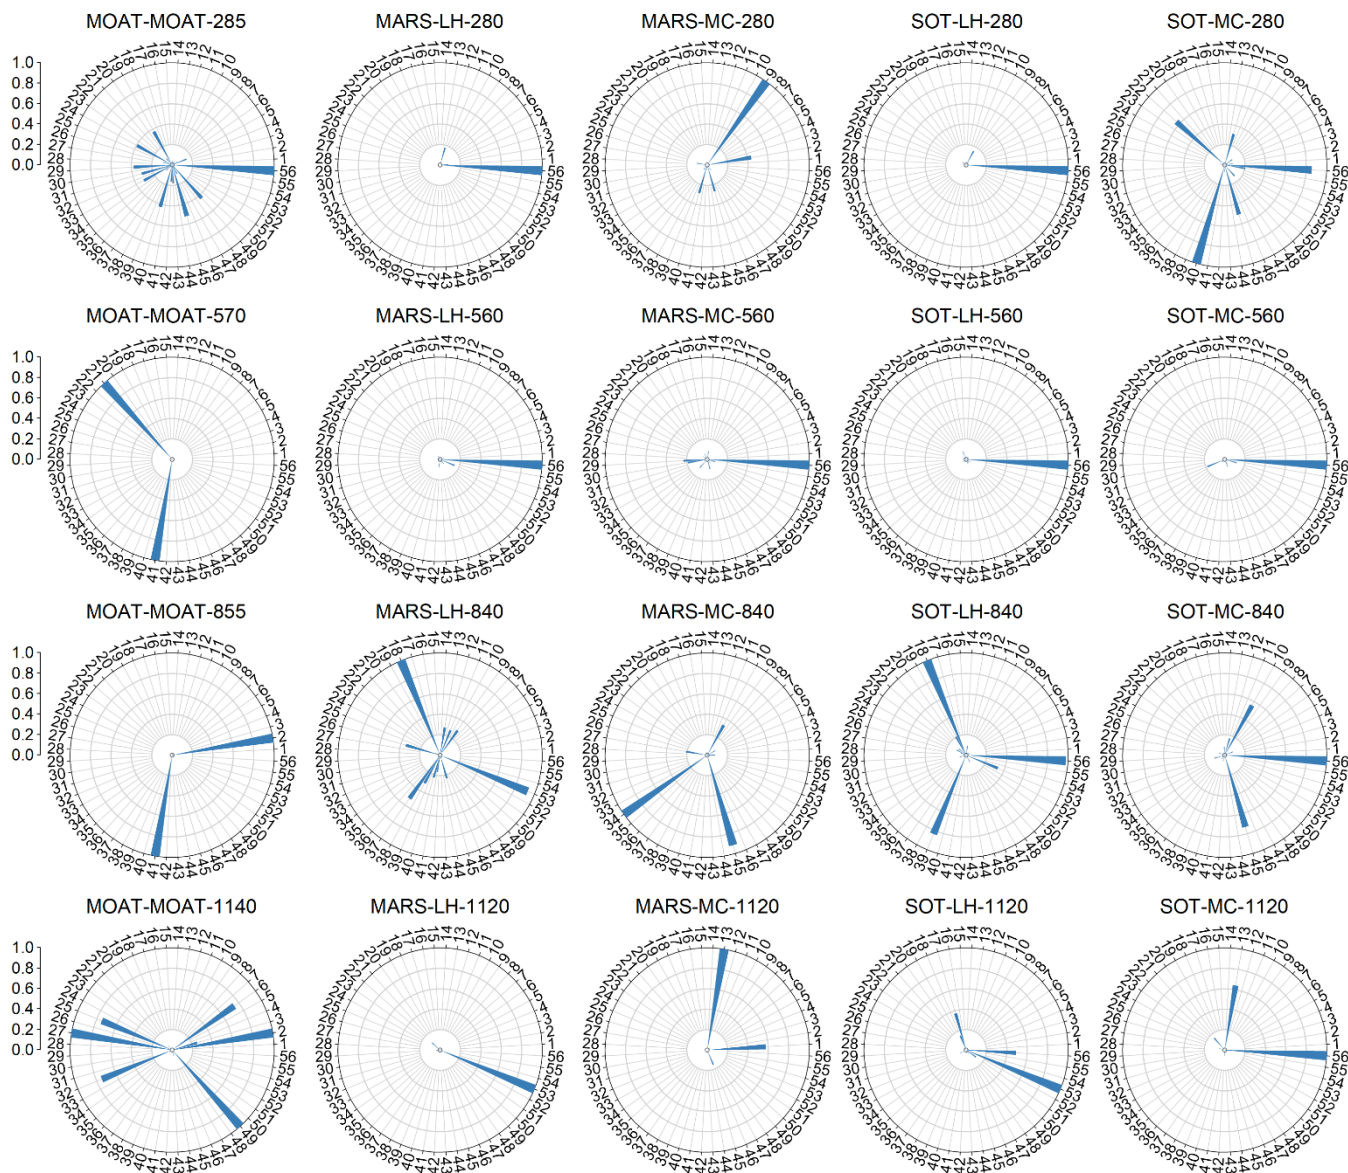

15 **Figure S2: Qualitative sensitivity analysis results based on the  $R^2$  objective function. The numbers on the outer ring represent parameter indices (refer to Table 2 for the corresponding parameter definitions). The length of each pointer indicates the normalized sensitivity index, ranging from 0 to 1, with longer pointers denoting higher sensitivity. Each subplot title follows the format “sensitivity analysis method-sampling technique-sample size”.**

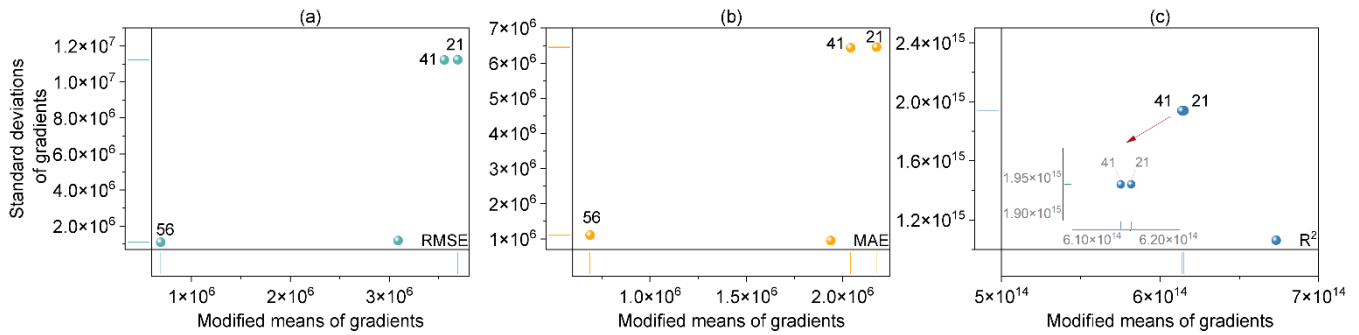

20 **Figure S3.** Sensitivity and interaction results from the MOAT method with a sample size of 570. The horizontal axis denotes the modified mean ( $\mu_i^*$ ), and the vertical axis denotes the standard deviation ( $\sigma_i^*$ ). Subplots (a)–(c) correspond to the *RMSE*, *MAE*, and *R<sup>2</sup>* objective functions, respectively.

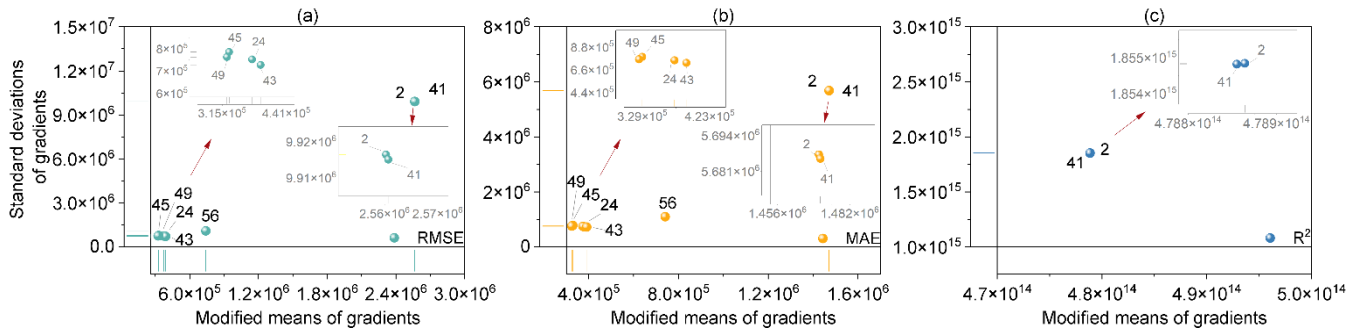

25 **Figure S4.** Sensitivity and interaction results from the MOAT method with a sample size of 855. The horizontal axis denotes the modified mean ( $\mu_i^*$ ), and the vertical axis denotes the standard deviation ( $\sigma_i^*$ ). Subplots (a)–(c) correspond to the *RMSE*, *MAE*, and *R<sup>2</sup>* objective functions, respectively.

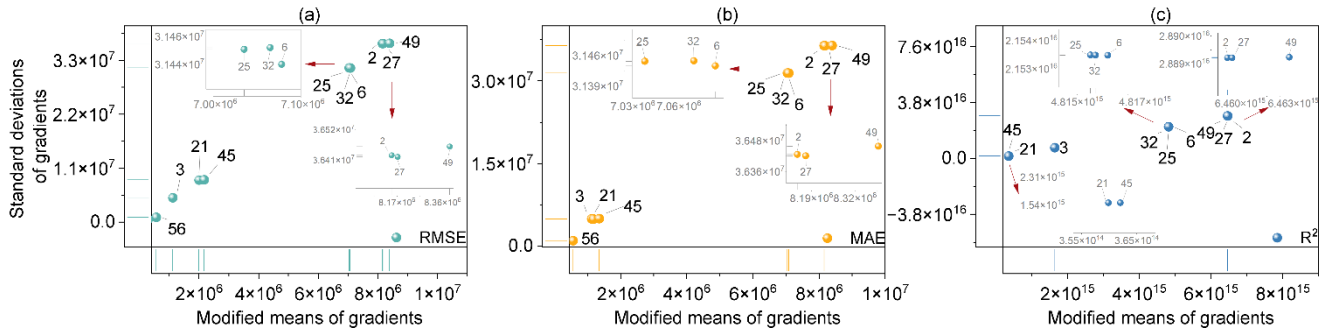

30 **Figure S5.** Sensitivity and interaction results from the MOAT method with a sample size of 1140. The horizontal axis denotes the modified mean ( $\mu_i^*$ ), and the vertical axis denotes the standard deviation ( $\sigma_i^*$ ). Subplots (a)–(c) correspond to the *RMSE*, *MAE*, and *R<sup>2</sup>* objective functions, respectively.

### S1.2 Sample quality check

To quantify the space-fillingness of a sample, PSUADE provides the command named ‘sqc’, which computes a few metrics such as the minimum distance between all pairs of sample points (the larger the better), the average minimum distance for all

sample points (the larger the better) and the minimum distance between the sample points and the corners (the smaller the better). However, the average minimum distances between all points and corners are not calculated when the number of input parameters is greater than 30. For the qualitative sensitivity experiment, since the input dimension is 56, only the first two distance indicators were calculated based on the normalized sampling results (Table S1).

**Table S1: Sample quality check for qualitative sensitivity analysis.**

| Method       | Sampling technique | Avg-min distance | Min-min distance |
|--------------|--------------------|------------------|------------------|
| MARS-5times  | MC                 | 3.041            | 2.063            |
| MARS-10times |                    | 3.043            | 1.890            |
| MARS-15times |                    | 3.043            | 1.954            |
| MARS-20times |                    | 3.040            | 1.844            |
| SOT-5times   | LH                 | 3.051            | 2.051            |
| SOT-10times  |                    | 3.048            | 1.981            |
| SOT-15times  |                    | 3.047            | 2.011            |
| SOT-20times  |                    | 3.047            | 1.936            |
| MOAT-5times  | MOAT               | 3.932            | 0.667            |
| MOAT-10times |                    | 4.005            | 0.667            |
| MOAT-15times |                    | 4.073            | 0.667            |
| MOAT-20times |                    | 4.062            | 0.667            |

The sampling quality metrics exhibit clear differences among the three sampling strategies. For the MARS and SOT methods, the average minimum distance (Avg-min distance) remains nearly constant at approximately 3.04–3.05 as the sample size increases, indicating that both approaches maintain a stable level of global space-filling capability. In contrast, their minimum pairwise distance (Min-min distance) shows a slight decreasing trend with increasing sample size, reflecting the expected densification of sample points in high-dimensional space as more samples are added. In contrast, the Avg-min distance for MOAT is significantly larger (ranging from 3.93 to 4.07) than those of MARS and SOT, indicating that sample points are more widely separated on average. Meanwhile, its Min-min distance remains constant at 0.667 regardless of sample size, reflecting the deterministic and grid-based nature of its trajectory design. This behaviour underscores that MOAT prioritizes structured one-at-a-time perturbations rather than achieving uniform coverage of the multidimensional input space.

Overall, the results demonstrate that MARS and SOT achieve a better balance between global coverage and local separation, making them more suitable for space-filling experimental design, while MOAT is inherently limited by its trajectory-based structure.

## S2: Results of quantitative validation of key sensitivity parameters

According to the response surface validation results across different experiments (Table S2), the error metrics  $Err_{rmss}$  and  $Err_{maxs}$  showed relatively high values. However, they were still 1–2 orders of magnitude smaller than the overall variation range of the sample outputs (Table S3). Further evaluation using  $Err_{maxs2}$  was therefore necessary. After min-max normalization, all  $Err_{maxs2}$  values were less than 1, and most of the average errors  $Err_{avgs}$  did not deviate significantly from 1, indicating that the accuracy of the response surfaces was acceptable. Furthermore, the coefficient of determination  $R_{rsm}^2$  from cross-validation was above 0 (0.122–0.658) when a GP was used as the response surface model. After applying a logarithmic transformation to the outputs (logGP),  $R_{rsm}^2$  increased to above 0.7 (0.726–0.837). For the parameter sets with input dimensions of 12 and 21, the remaining errors decreased by orders of magnitude. These results indicated that the response surfaces trained on the loaded samples (constructed from input parameters and  $RMSE$  outputs) were of good quality, and also suggested that the output range influenced the fitting accuracy. In addition, the data points in the corresponding diagnostic plots were closely distributed along the diagonal (Fig. S6–Fig. S8), further supporting this conclusion. Based on the above evaluation metrics, both GP and logGP response surfaces can be considered reliable and suitable for subsequent quantitative sensitivity analysis.

**Table S2: Response surface cross-validation metrics.**

| Experiment <sup>a</sup> | Response surface | $Err_{avgs}$ | $Err_{rmss}$ | $Err_{maxs}$        | $Err_{maxsb}$          | $Err_{maxs2}$ | $R_{rsm}^2$ |
|-------------------------|------------------|--------------|--------------|---------------------|------------------------|---------------|-------------|
| 8-50times               | GP               | 1.623        | 16.820       | 174.700             | 0.610                  | 0.711         | 0.372       |
|                         | logGP            | 1.669        | 29.360       | 633.700             | 0.005                  | 0.687         | 0.786       |
| 8-100times              | GP               | 6.079        | 64.540       | 1531.000            | 0.478                  | 0.678         | 0.203       |
|                         | logGP            | 11.310       | 236.400      | 7401.000            | $6.712 \times 10^{-5}$ | 0.687         | 0.726       |
| 8-150times              | GP               | 5.542        | 73.020       | 937.600             | 1.302                  | 0.900         | -           |
|                         | logGP            | 10.950       | 304.400      | $1.173 \times 10^4$ | $6.712 \times 10^{-5}$ | 0.625         | 0.792       |
| 12-40times              | GP               | 1.284        | 41.610       | 435.800             | 1.100                  | 0.902         | 0.122       |
|                         | logGP            | 0.449        | 5.700        | 78.810              | 0.036                  | 0.734         | 0.737       |
| 12-80times              | GP               | 1.713        | 37.850       | 568.900             | 1.100                  | 0.705         | 0.548       |
|                         | logGP            | 0.412        | 6.750        | 103.700             | 0.040                  | 0.748         | 0.758       |
| 12-100times             | GP               | 1.466        | 44.420       | 616.900             | 0.659                  | 0.483         | 0.804       |

|             |       |                     |                     |                     |                        |       |       |
|-------------|-------|---------------------|---------------------|---------------------|------------------------|-------|-------|
|             | logGP | 0.539               | 7.261               | 159.900             | 0.017                  | 0.620 | 0.818 |
| 21-20times  | GP    | 299.200             | 4966.000            | $1.043 \times 10^5$ | 0.637                  | 0.894 | 0.658 |
|             | logGP | 1.382               | 9.868               | 118.800             | 0.008                  | 0.670 | 0.832 |
| 21-40times  | GP    | $2.655 \times 10^4$ | $4.782 \times 10^5$ | $7.188 \times 10^6$ | 0.365                  | 1.000 | -     |
|             | logGP | 0.618               | 7.354               | 129.800             | 0.008                  | 0.962 | 0.746 |
| 21-100times | GP    | $1.672 \times 10^4$ | $3.869 \times 10^6$ | $9.006 \times 10^7$ | 0.514                  | 1.201 | -     |
|             | logGP | 2.328               | 53.590              | 2166.000            | $7.869 \times 10^{-5}$ | 0.921 | 0.837 |

<sup>a</sup>“ $n$ - $k$  times” in the column of “Experiment” denotes an experimental configuration with  $n$  input parameters and a sample size equal to  $k$  times the number of parameters. In the software implementation, the actual number of model runs (sample sizes) is  $k \times (n + 2)$ .

**Table S3: Range of RMSE outputs in the RSMSobol analysis experiments.**

| Experiment <sup>a</sup> | Response surface | Sample Output <sub>min</sub> | Sample Output <sub>max</sub> |
|-------------------------|------------------|------------------------------|------------------------------|
| 8-50 times              | GP               | $4.783662 \times 10^{-1}$    | $1.192372 \times 10^3$       |
|                         | logGP            | $-7.373787 \times 10^{-1}$   | 7.083700                     |
| 8-100 times             | GP               | $4.783662 \times 10^{-1}$    | $1.467529 \times 10^3$       |
|                         | logGP            | $-7.373787 \times 10^{-1}$   | 7.291335                     |
| 12-40 times             | GP               | $3.924328 \times 10^{-1}$    | $1.625459 \times 10^3$       |
|                         | logGP            | $-9.353899 \times 10^{-1}$   | 7.393545                     |
| 12-80 times             | GP               | $3.827627 \times 10^{-1}$    | $2.079594 \times 10^3$       |
|                         | logGP            | $-9.603402 \times 10^{-1}$   | 7.639928                     |
| 12-100 times            | GP               | $3.827627 \times 10^{-1}$    | $3.835408 \times 10^3$       |
|                         | logGP            | $-9.603402 \times 10^{-1}$   | 8.252031                     |
| 21-20 times             | GP               | $3.812231 \times 10^{-1}$    | $1.847612 \times 10^5$       |
|                         | logGP            | $-9.643704 \times 10^{-1}$   | $1.212682 \times 10^1$       |
| 21-40 times             | GP               | $3.190905 \times 10^{-1}$    | $3.820296 \times 10^7$       |
|                         | logGP            | -1.142281                    | $1.745842 \times 10^1$       |
| 21-100 times            | GP               | $3.190905 \times 10^{-1}$    | $3.856754 \times 10^7$       |
|                         | logGP            | -1.142281                    | $1.746792 \times 10^1$       |

70 <sup>a</sup>“ $n$ - $k$  times” in the column of “Experiment” denotes an experimental configuration with  $n$  input parameters and a sample size equal to  $k$  times the number of parameters. In the software implementation, the actual number of model runs (sample sizes) is  $k \times (n + 2)$ .

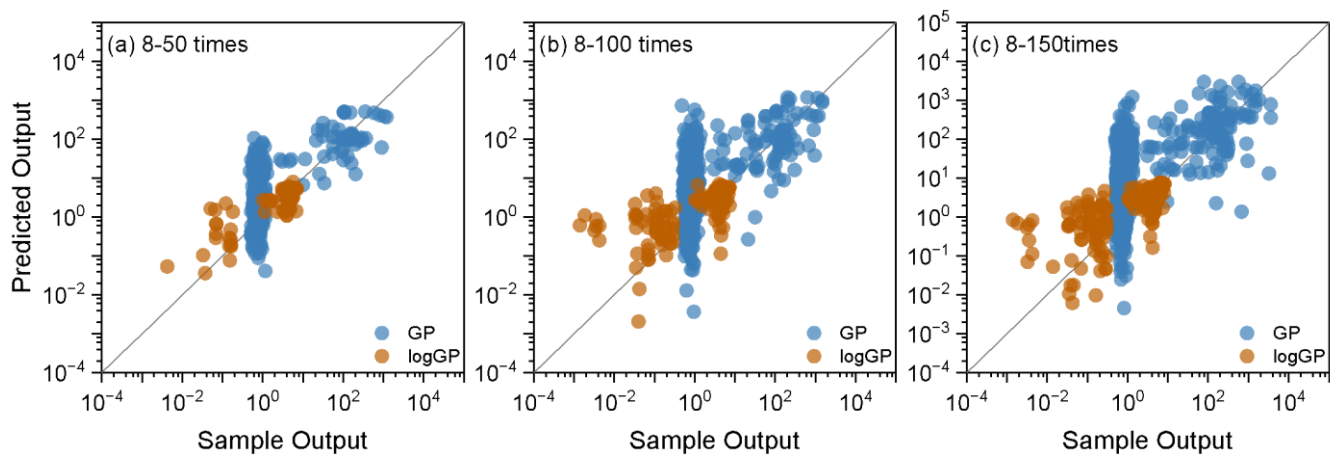

Figure S6: Response surface cross-validation scatter plot for the case where the input dimension is 8.

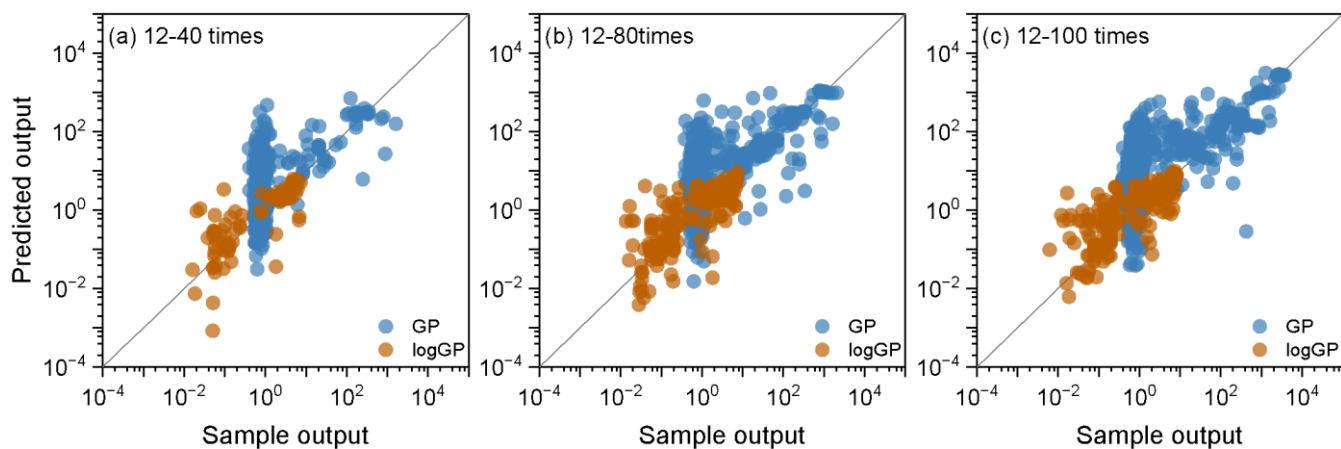

75 Figure S7: Response surface cross-validation scatter plot for the case where the input dimension is 12.

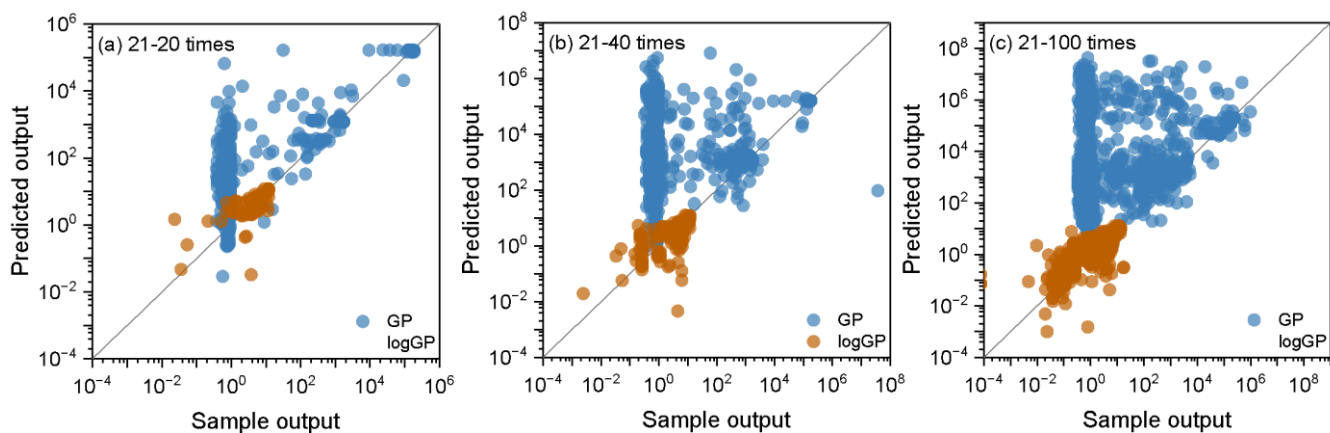

Figure S8: Response surface cross-validation scatter plot for the case where the input dimension is 21.

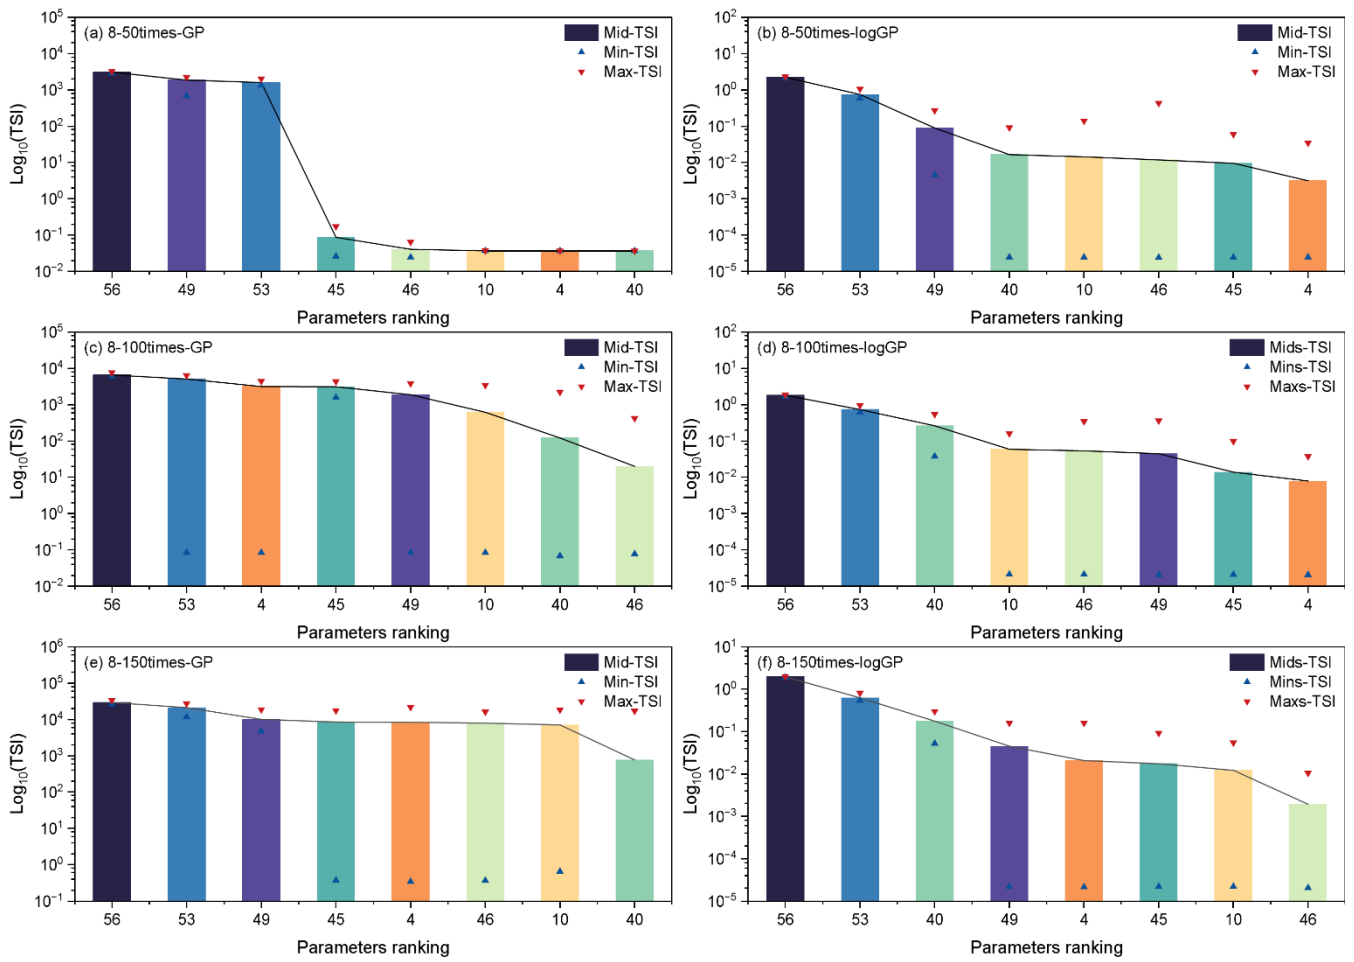

Figure S9: The ranking results of quantitative sensitivity indicators when the input dimension is 8.

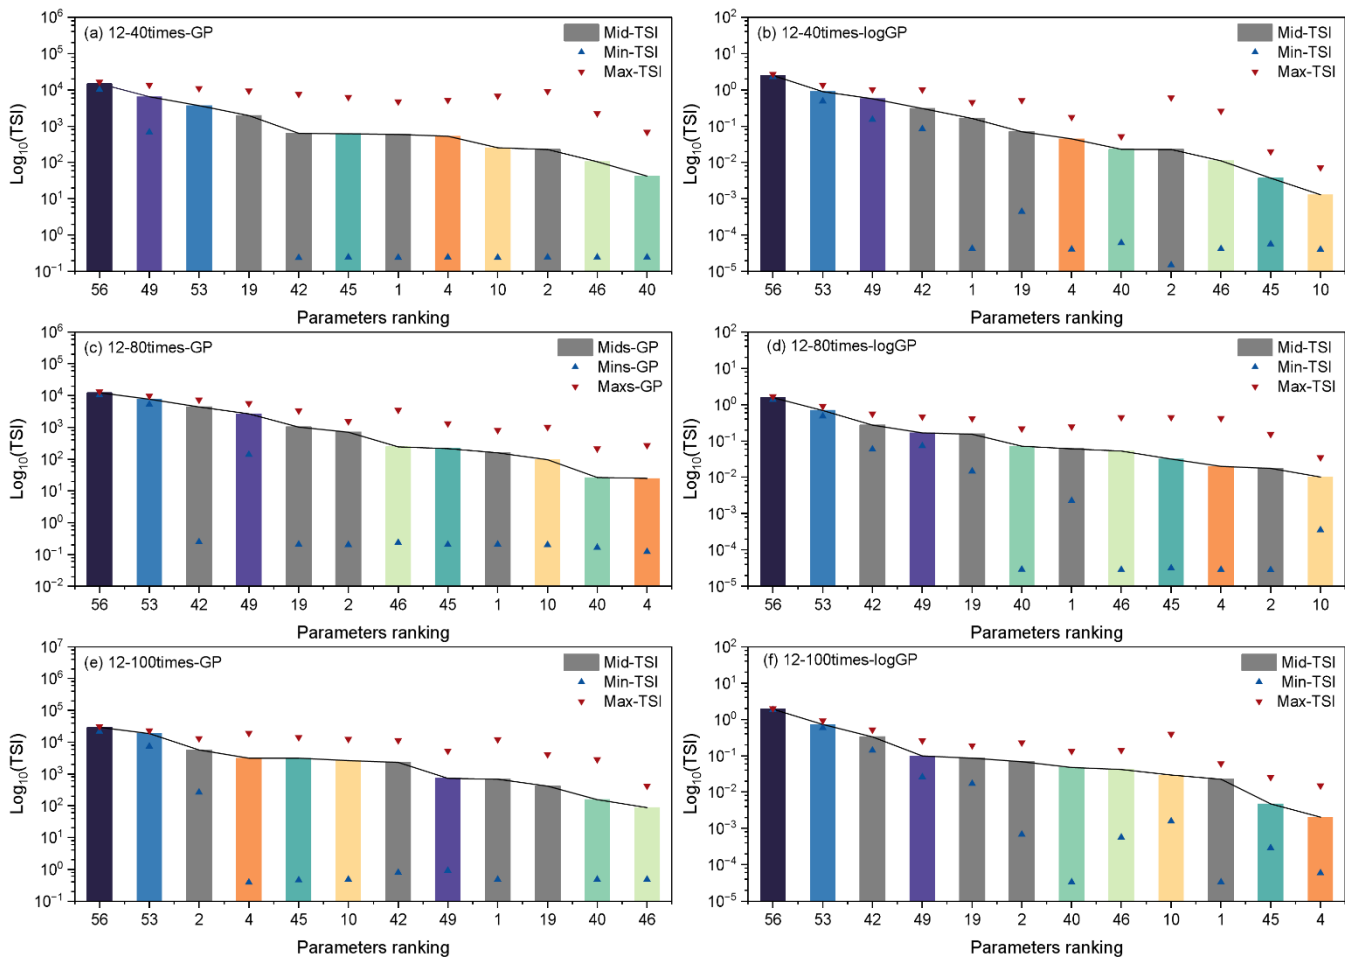

80

Figure S10: The ranking results of quantitative sensitivity indicators when the input dimension is 12.

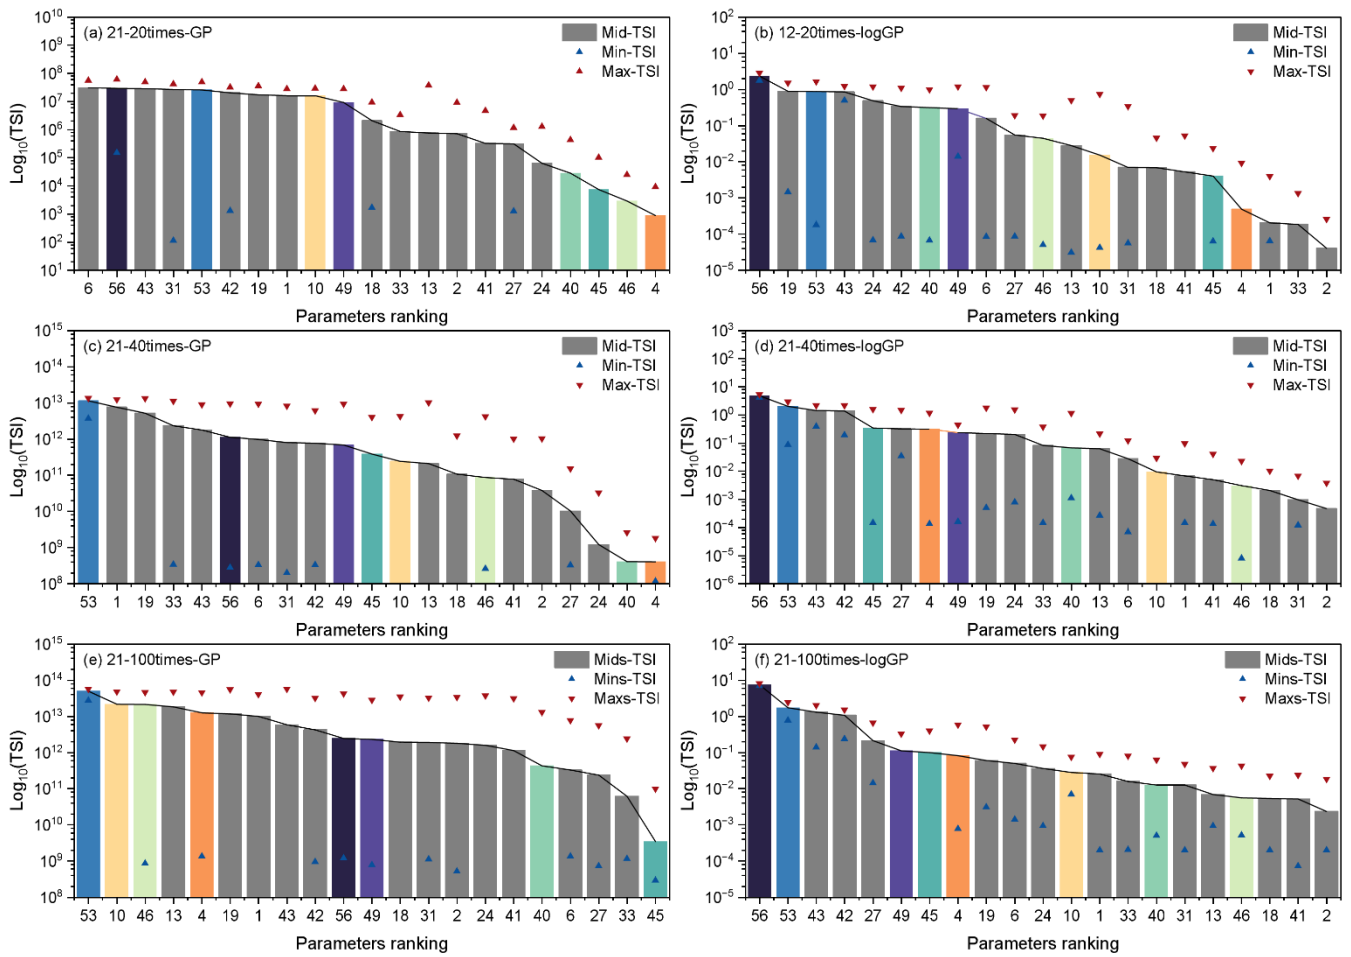

Figure S11: The ranking results of quantitative sensitivity indicators when the input dimension is 21.

### S3: Results of optimal estimation of key sensitivity parameters

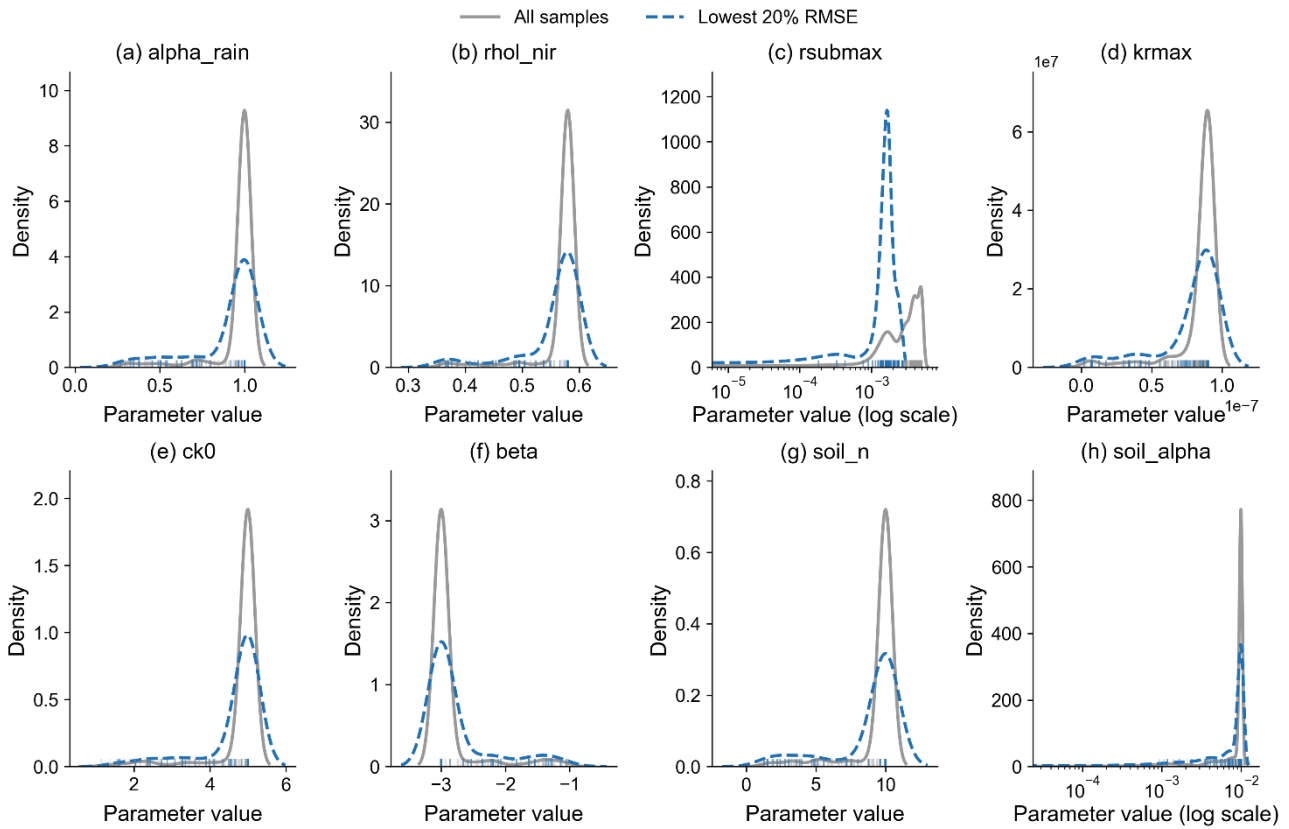

**Figure S12: Comparison of KDE for the top 20% low-RMSE parameter sets (blue) versus the entire set of 500 evaluations (grey) obtained by the PSO method: (a)  $\alpha_{rain}$ , (b)  $\rho_{l\_nir}$ , (c)  $r_{submax}$ , (d)  $kr_{max}$ , (e)  $ck_0$ , (f)  $\beta$ , (g)  $soil\_n$ , and (h)  $soil\_alpha$ .**

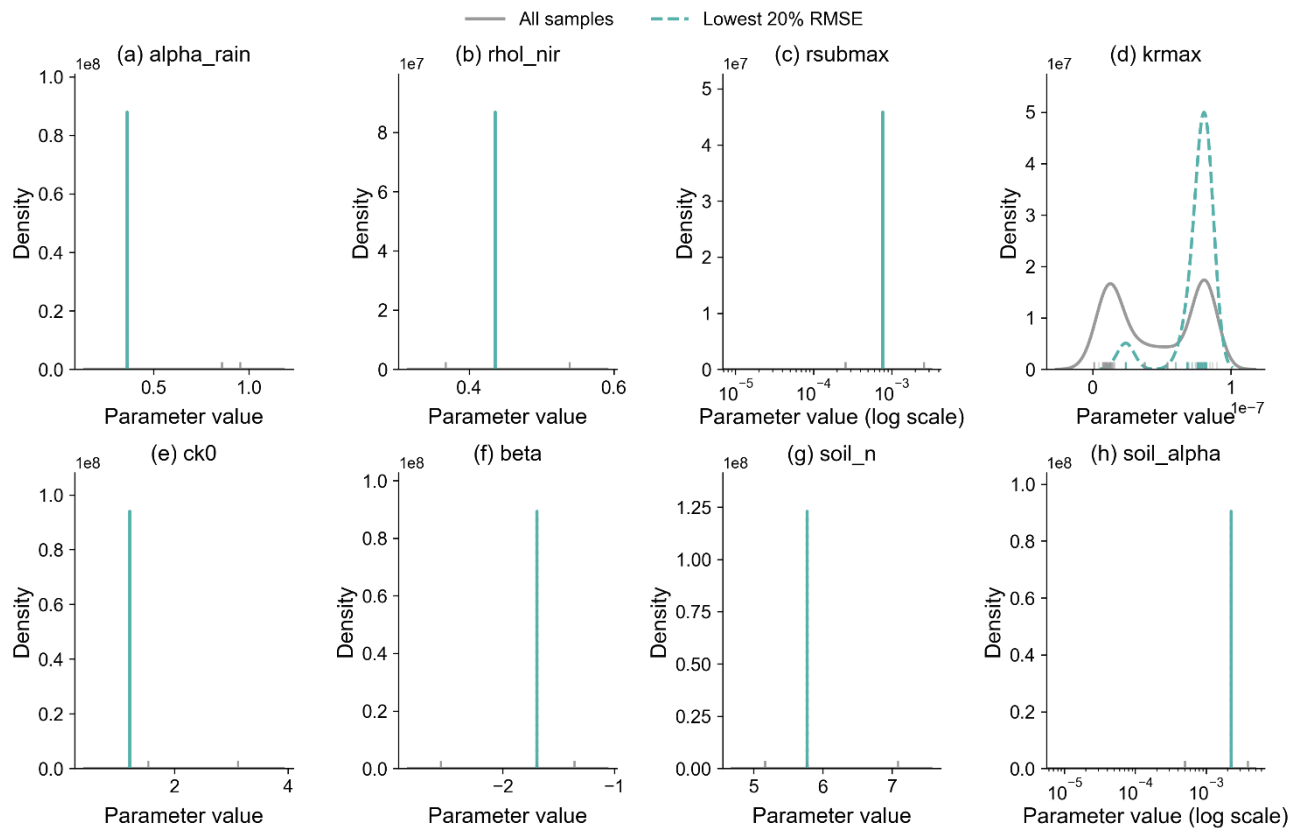

90 **Figure S13: Comparison of KDE for the top 20% low-*RMSE* parameter sets (green) versus the entire set of 500 evaluations (grey) obtained by the BOBYQA method: (a)  $\alpha_{rain}$ , (b)  $\rho_{hol\_nir}$ , (c)  $r_{submax}$ , (d)  $kr_{max}$ , (e)  $ck_0$ , (f)  $\beta$ , (g)  $soil\_n$ , and (h)  $soil\_alpha$ .**

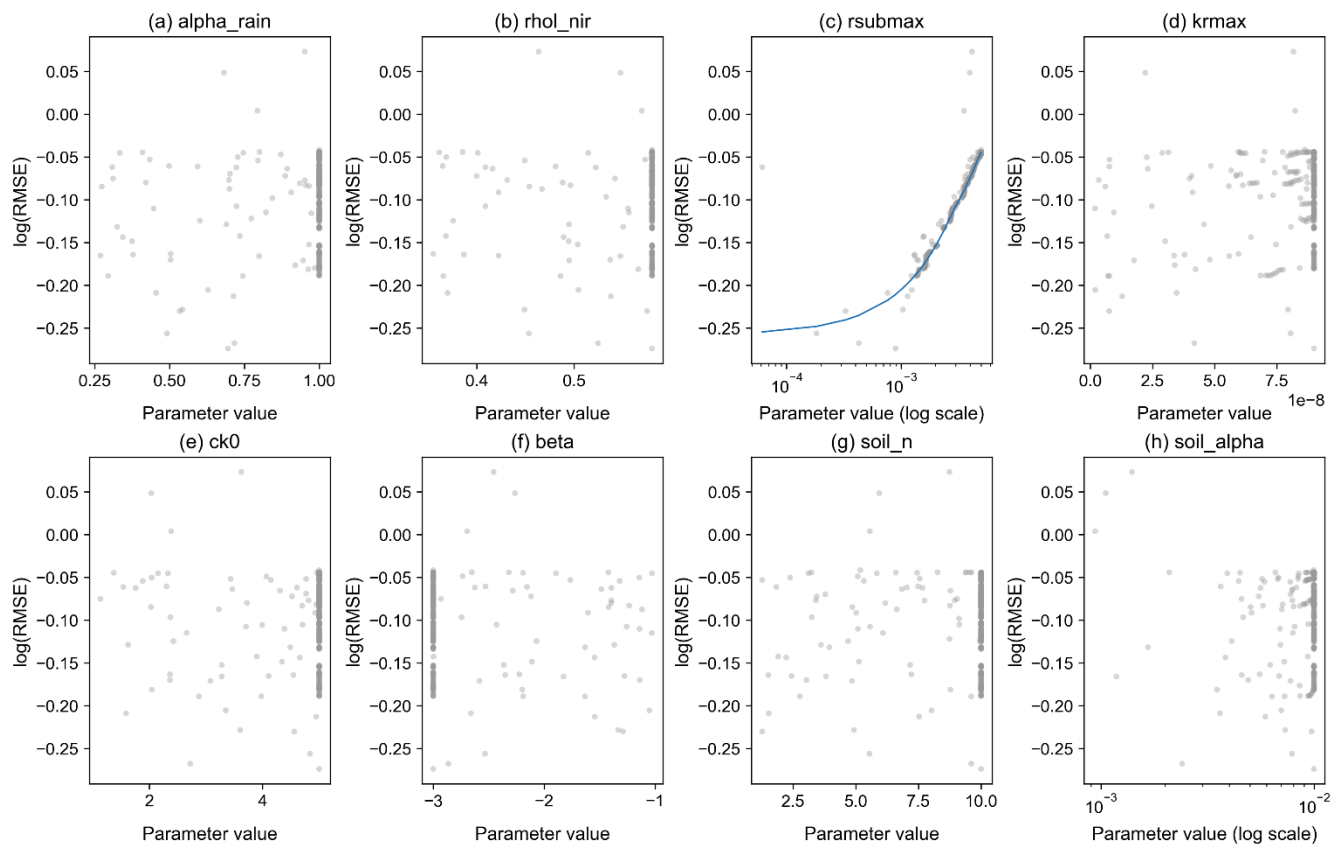

95 **Figure S14: Scatter plots of RMSE against parameter values based on 500 evaluations obtained during the PSO optimization process: (a)  $\alpha_{\text{rain}}$ , (b)  $\rho_{l\_nir}$ , (c)  $r_{\text{submax}}$ , (d)  $k_{\text{rmax}}$ , (e)  $ck_0$ , (f)  $\beta$ , (g)  $\text{soil}_n$ , and (h)  $\text{soil}_\alpha$ .**

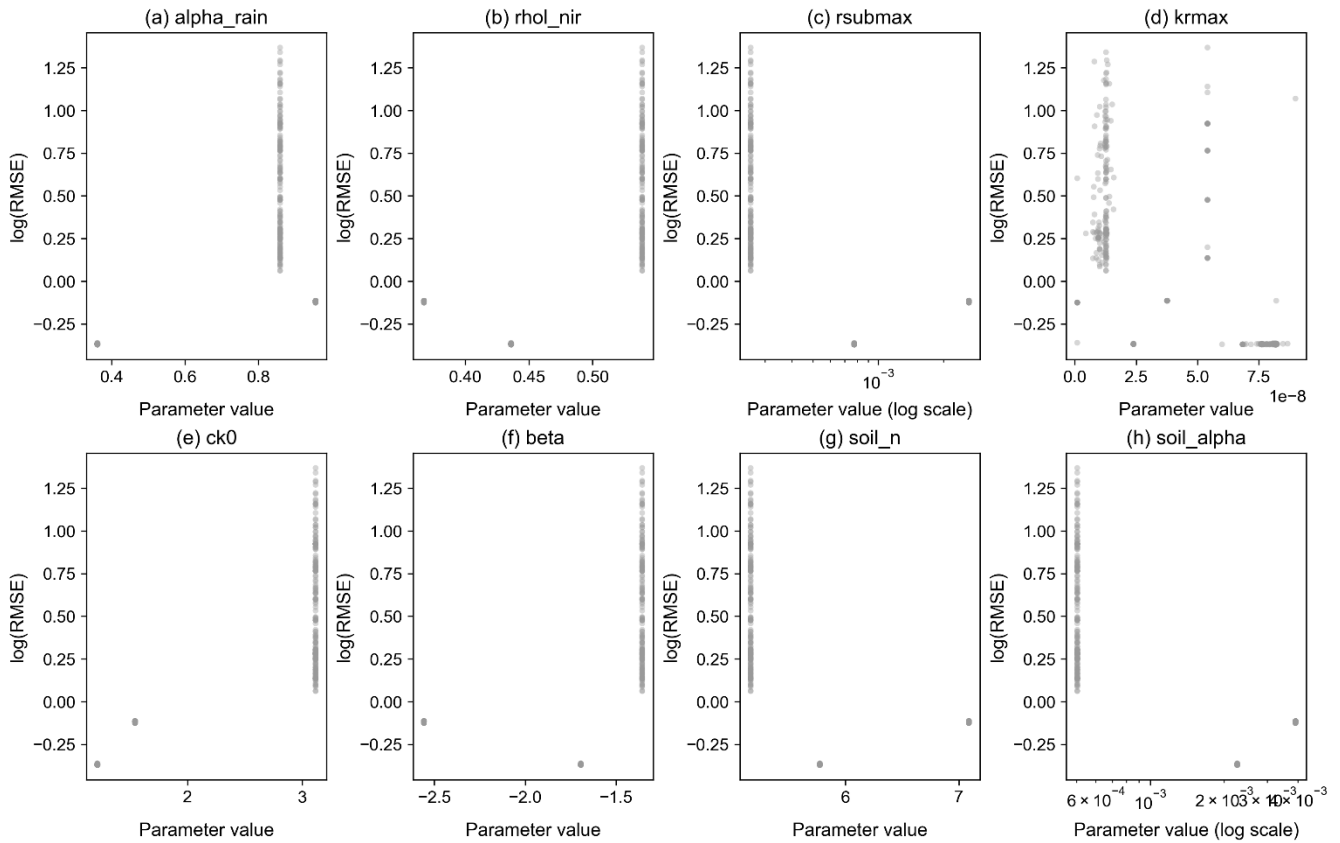

100 **Figure S15: Scatter plots of RMSE against parameter values based on 500 evaluations obtained during the BOBYQA optimization process: (a) alpha\_rain, (b) rhol\_nir, (c) rsubmax, (d) krmax, (e) ck0, (f) beta, (g) soil\_n, and (h) soil\_alpha.**

#### S4: Mathematical formulations of eight stably sensitive parameters

This section provides the detailed governing equations for the parameters identified as stably sensitive to water table depth (WTD) dynamics in CoLM. Table S4 lists these parameters.

**Table S4: Summary of the eight sensitive parameters.**

| Variable Name | Parameter Symbol | Reference Section |
|---------------|------------------|-------------------|
| 56-soil_alpha | $\alpha$         | Sect S4.1         |
| 53-soil_n     | $n$              | Sect S4.1         |
| 40-rsubmax    | $r_{sub,max}$    | Sect S4.2         |
| 49-beta       | $\beta$          | Sect S4.3         |

|              |                     |           |
|--------------|---------------------|-----------|
| 45-krmax     | $k_{soil-soot,max}$ | Sect S4.3 |
| 46-ck0       | $ck_0$              | Sect S4.3 |
| 4-alpha_rain | $\alpha_{rain}$     | Sect S4.4 |
| 10-rhol_nir  | $\rho_{l,nir}$      | Sect S4.4 |

---

105

### S4.1 Unsaturated water movement

Water flux between adjacent soil layers is calculated as (Dai et al., 2019):

$$q_{hm}(\Delta z, h_u, h_l) = -K_{hm} \cdot \left( \frac{h_l - h_u}{\Delta z} - 1 \right), \quad (S1)$$

110 where  $q_{hm}$  is a function for calculating water flux within a homogeneous soil medium ( $\text{mm s}^{-1}$ ),  $\Delta z$  is the thickness of the soil layer (mm),  $h_u$  and  $h_l$  are the soil water potentials at the upper and lower boundaries of the soil layer, respectively (mm), and  $K_{hm}$  is the equivalent hydraulic conductivity ( $\text{mm s}^{-1}$ ), which is the function of hydraulic conductivity  $K$  of soil layer and parameter  $r_0$  associated with soil hydraulic model and parameters of soil hydraulic properties.

The soil hydraulic properties are then described using the van Genuchten–Mualem (VGM) model (Ippisch et al., 2006):

$$S_e = \begin{cases} \frac{1}{S_c} \cdot [1 + (\alpha\psi)^n]^{-m}, & \psi < \psi_s \\ 1, & \psi \geq \psi_s \end{cases}, \quad (S2)$$

$$115 \quad S_e = \frac{\theta - \theta_r}{\theta_s - \theta_r}, \quad (S3)$$

$$S_c = [1 + (\alpha\psi_s)^n]^{-m}, \quad (S4)$$

$$m = 1 - \frac{1}{n}, \quad (S5)$$

$$K = K_s \cdot S_e^l \cdot \left[ \frac{1 - (1 - (S_e S_c)^{1/m})^m}{1 - (1 - S_c^{1/m})^m} \right]^2, \quad (S6)$$

$$r_0 = \frac{1}{l(n-1) + 2n}, \quad (S7)$$

120 where  $S_e$  is the effective saturation (–),  $S_c$  is the saturation at the cut-off point (–),  $\alpha$  is a shape parameter related to the inverse of the air-entry suction ( $\text{mm}^{-1}$ ),  $n$  is a shape parameter representing the pore-size distribution (–),  $\psi$  is the unsaturated soil water potential (mm),  $\psi_s$  is the saturated matric potential (mm),  $\theta$  is the volumetric water content ( $\text{mm mm}^{-3}$ ),  $\theta_r$  is the residual soil water content ( $\text{mm mm}^{-3}$ ),  $\theta_s$  is the saturated volumetric water content ( $\text{mm mm}^{-3}$ ),  $K$  is the unsaturated hydraulic conductivity ( $\text{mm s}^{-1}$ ),  $K_s$  is the saturated hydraulic conductivity ( $\text{mm s}^{-1}$ ), and  $l$  is the pore-  
125 connectivity parameter (–).

## S4.2 Subsurface runoff parameterization

Subsurface runoff is parameterized as (Niu et al., 2005):

$$r_{subsurface} = r_{sub,max} e^{-f_{drai} \times z_{wt}}, \quad (S8)$$

130 where  $r_{subsurface}$  is the subsurface runoff ( $\text{mm s}^{-1}$ ),  $r_{sub,max}$  is the maximum subsurface runoff when the max grid cell mean water table depth is zero (with a model default value of  $5.5 \times 10^{-3} \text{ mm s}^{-1}$ ) ( $\text{mm s}^{-1}$ ),  $f_{drai}$  is the decay factor (with a model default value of  $2.5 \text{ m}^{-1}$ ) ( $\text{m}^{-1}$ ), and  $z_{wt}$  is water table depth (m).

When soil ice is present, the impedance factor is applied (Niu and Yang, 2006):

$$f_{impd,ice} = 1 - \frac{e^{-\alpha_{ice} \times (1 - f_{ice,sum})} - e^{-\alpha_{ice}}}{1 - e^{-\alpha_{ice}}}, \quad (S9)$$

$$135 \quad r_{subsurface} = f_{impd,ice} \times r_{sub,max} e^{-f_{drai} \times z_{wt}}, \quad (S10)$$

where  $f_{impd,ice}$  is the impedance factor accounting for the effect of ice on soil permeability (–),  $\alpha_{ice}$  is an adjustable scale-dependent parameter with a prescribed value of 3 in the model (–),  $f_{ice,sum}$  represents the total volumetric ice content within and below the soil layer where the water table is located (–).

## S4.3 Plant hydraulics and transpiration processes

### 140 S4.3.1 Root transpiration

Root transpiration is the primary component of the source-sink term in the soil moisture governing equation. Root water uptake is driven by the water potential gradient between the soil and the roots (Van Den Honert, 1948; Kennedy et al., 2019; Amenu and Kumar, 2008; Zhu et al., 2017):

$$q_{root,i} = k_{soil-soot,i} (\psi_{soil,i} - \psi_{root,i}), \quad (S11)$$

145 where  $q_{root,i}$  represents the radial water transport rate ( $\text{s}^{-1}$ ),  $k_{soil-soot,i}$  is the soil-and-root conductance ( $\text{mm s}^{-1}$ ),  $\psi_{soil,i}$  and  $\psi_{root,i}$  denote the water potentials of the  $i$ -th soil node and the root node, respectively (mm).

The conductance is calculated as (Kennedy et al., 2019):

$$k_{soil-soot,i} = \frac{k_{root,i} k_{soil,i}}{k_{root,i} + k_{soil,i}}, \quad (S12)$$

$$k_{root,i} = \frac{k_{soil-soot,max}}{l_{root,lateral} + z_{soil,i}} \cdot RAI \cdot 2^{-\left(\frac{\psi_{soil,i}}{p_{50root}}\right)^{c_k}}, \quad (S13)$$

$$150 \quad RAI = (LAI + SAI) \cdot r_i \cdot f_{root-leaf}, \quad (S14)$$

$$k_{soil,i} = \frac{\min(k_{sat,i}, k_{s,i})}{1000 dx_{root,i}}, \quad (S15)$$

where  $k_{root,i}$  and  $k_{soil,i}$  are the root and soil hydraulic conductance, respectively ( $\text{s}^{-1}$ ),  $k_{soil-soot,max}$  is the root conductance per area and per length ( $\text{mm s}^{-1}$ ),  $l_{root,lateral}$  is the lateral root length (mm),  $z_{soil,i}$  is the soil layer depth (mm),  $RAI$  is the

Root Area Index (-),  $p50_{root}$  is the water potential at which 50% of root hydraulic conductivity is lost (mm),  $c_k$  is a shape factor fitting the vulnerability curve (-),  $SAI$  and  $LAI$  are the Stem and Leaf Area Indices (-),  $r_i$  is the root fraction (-),  $f_{root-leaf}$  is a scaling ratio (-),  $k_{sat,i}$  and  $k_{s,i}$  represent the saturated and unsaturated hydraulic conductivity of the  $i$ -th layer ( $\text{mm s}^{-1}$ ),  $dx_{root,i}$  is the distance between roots (m).

For root fraction, the model utilizes the scheme `ROOTFR_SCHEME = 1`. For each land cover type  $n$ , the root fraction for each soil layer is defined as (Schenk and Jackson, 2002):

$$r_{i,n} = \begin{cases} \frac{1}{\left(1 + \frac{100z_{soil,1}}{d_{50,n}}\right)^{\beta n}}, & i = 1 \\ \frac{1}{\left(1 + \frac{100z_{soil,i}}{d_{50,n}}\right)^{\beta n}} - \frac{1}{\left(1 + \frac{100z_{soil,i-1}}{d_{50,n}}\right)^{\beta n}}, & i = 2, nl\_soil \\ 1 - \frac{1}{\left(1 + \frac{100z_{soil,nl\_soil-1}}{d_{50,n}}\right)^{\beta n}}, & i = nl\_soil \end{cases}, \quad (S16)$$

where  $z_{soil}$  is the interface depth (m),  $d_{50}$  is the depth containing 50% of the root system (m),  $\beta$  is a dimensionless shape factor (-).

### S4.3.2 Plant Hydraulic

By default, CoLM sets `DEF_USE_PLANTHYDRAULICS = .true.`, The vegetation hydraulic module calculates transpiration based on the Soil-Plant-Atmosphere Continuum (SPAC) concept, where water transport is driven by water potential gradients.

Assuming a steady-state water transport within the plant, the governing equations are as follows (Kennedy et al., 2019):

$$q_{sun \leftarrow stem} = k_{sun \leftarrow stem}(\psi_{sun} - \psi_{stem}), \quad (S17)$$

$$q_{sha \leftarrow stem} = k_{sha \leftarrow stem}(\psi_{sha} - \psi_{stem}), \quad (S18)$$

$$q_{stem \leftarrow root} = k_{stem \leftarrow root}(\psi_{stem} - \psi_{root,0}), \quad (S19)$$

where  $q$  denotes the water flux ( $\text{mm s}^{-1}$ ),  $K$  represents the hydraulic conductance ( $\text{s}^{-1}$ ),  $\psi$  is the water potential (mm), the subscripts *sun*, *sha*, *stem*, *root*, and *root,0* represent sunlit leaves, shaded leaves, stem, root and root at surface, respectively.

Hydraulic conductance varies with changes in plant water potential. It is based on a sigmoidal vulnerability curve (Kennedy et al., 2019):

$$k_{i \leftarrow j} = k_{max} \cdot 2^{-\left(\frac{\psi_j}{p50}\right)^{c_k}}, \quad (S20)$$

where  $k_{max}$  is the maximum hydraulic conductance ( $\text{s}^{-1}$ ),  $\psi_j$  is the water potential at node  $j$  (mm),  $p50$  represents the water potential at which hydraulic conductance is reduced by 50% (mm),  $c_k$  is the shape parameter of the vulnerability curve (-).

Simultaneously, the above-ground water fluxes satisfy the following mass conservation equations (Kennedy et al., 2019):

$$E_{sun} = q_{sun \leftarrow stem}, \quad (S21)$$

$$E_{sha} = q_{sha \leftarrow stem}, \quad (S22)$$

$$q_{sha \leftarrow stem} + q_{sun \leftarrow stem} = q_{stem \leftarrow root}, \quad (S23)$$

$$q_{stem \leftarrow root} = q_{root,0}, \quad (S24)$$

where  $E_{sun}$  and  $E_{sha}$  represent the transpiration rates for sunlit and shaded leaves, respectively ( $\text{mm s}^{-1}$ ).

185 These rates are determined by the potential transpiration and a transpiration reduction function controlled by leaf water potential (Kennedy et al., 2019):

$$E_{sun} = E_{sun,max} \cdot 2^{-\left(\frac{\psi_{sun}}{p_{50}}\right)^{c_k}}, \quad (S25)$$

$$E_{sha} = E_{sha,max} \cdot 2^{-\left(\frac{\psi_{sha}}{p_{50}}\right)^{c_k}}, \quad (S26)$$

where  $E_{sun,max}$  and  $E_{sha,max}$  are the transpiration rates under non-water-stressed conditions ( $\text{mm s}^{-1}$ ).

## 190 S4.4 Surface water input and energy balance

### S4.4.1 Precipitation after interception

The model employs the CoLM2014 scheme by default (DEF\_Interception\_scheme = 1), where the net precipitation reaching the ground  $p_{rain}$  is defined as:

$$p_{rain} = \frac{x_{sc} + thru_{rain}}{\Delta t}, \quad (S27)$$

195 where  $p_{rain}$  is the net precipitation reaching the ground ( $\text{mm s}^{-1}$ ),  $x_{sc}$  represents the excess water exceeding the maximum canopy storage capacity (mm),  $thru_{rain}$  denotes the canopy throughfall from effective precipitation areas (mm),  $\Delta t$  is the time duration (s).

When calculating  $thru_{rain}$  (with DEF\_VEG\_SNOW = .false.), it is assumed that only liquid water can be shed from the canopy (Lawrence et al., 2019):

$$200 \quad thru_{rain} = (R_c + R_l)\Delta t \left(1 - \delta_p\right) \frac{a_p}{b} (1 - e^{-bx_s}) + c_p x_s + L_{dew} x_s - S_c x_s, \quad (S28)$$

$$\delta_p = 1 - \alpha_{rain} \times [1 - e^{-K_p \times LSAI}], \quad (S29)$$

where  $R_c$  and  $R_l$  are the convective and large-scale rainfall rates ( $\text{mm s}^{-1}$ ),  $\delta_p$  is the canopy throughfall coefficient (-),  $x_s$  represents the fraction of the saturated area (-),  $L_{dew}$  is the depth of water on the foliage (mm),  $S_c$  is the maximum canopy storage capacity (mm),  $\alpha_{rain}$  is an empirical coefficient reflecting the water-holding capacity of leaves (-),  $K_p$  represents the

205 extinction coefficient (-), and  $LSAI$  represents the sum of  $LAI$  and  $SAI$  (-).

### S4.4.2 Snowmelt and energy balance

The snowmelt rate  $S_m$  is driven by the energy surplus or deficit:

$$S_m = \max\left(0, \frac{H_i \Delta t / L_f}{\Delta t}\right), \quad (S30)$$

$$H_i = f(h_s, T, T_f, \alpha_{Grank}, F, c, \Delta t, \Delta z), \quad (S31)$$

210 where  $s_m$  is the snowmelt rate ( $\text{mm s}^{-1}$ ),  $H_i$  is the energy surplus or deficit ( $\text{W m}^{-2}$ ),  $L_f$  is the latent heat of fusion ( $\text{J kg}^{-1}$ ),  $h_s$  is the net heat flux entering the surface ( $\text{W m}^{-2}$ ),  $T$  is the temperature of the snow/soil (K),  $T_f$  is the freezing temperature (K),  $\alpha_{Grank}$  is the Crank-Nicholson factor (-),  $F$  is the heat flux ( $\text{W m}^{-2}$ ),  $c$  is the volumetric heat capacity ( $\text{J m}^{-3} \text{K}^{-1}$ ),  $\Delta t$  is the times duration, and  $\Delta z$  is the soil layer thickness.

The net heat flux entering the ground surface,  $h_s$ , is expressed as follows:

$$215 \quad h_s = S_g + L_g(T_g) - H_g(T_g) - \lambda E_g(T_g) + H_{prcg}(T_g), \quad (S32)$$

where  $S_g$  and  $L_g$  represent the net solar (shortwave) radiation and net longwave radiation absorbed by the ground surface ( $\text{W m}^{-2}$ ),  $H_g$  is the sensible heat flux ( $\text{W m}^{-2}$ ),  $\lambda E_g$  is the latent heat flux ( $\text{W m}^{-2}$ ),  $H_{prcg}$  is the sensible heat flux from precipitation ( $\text{W m}^{-2}$ ), and  $T_g$  is the soil surface temperature (K).

The net solar radiation,  $S_g$ , is expressed as follows:

$$220 \quad S_g = S_{vg} - S_{sun} - S_{sha}, \quad (S33)$$

where  $S_{vg}$  is the total solar shortwave radiation flux absorbed by the surface (including both ground and vegetation) ( $\text{W m}^{-2}$ ),  $S_{sun}$  and  $S_{sha}$  represent the radiation absorption by sunlit and shaded leaves, respectively ( $\text{W m}^{-2}$ ).

The total radiation flux absorbed by the vegetation-soil system is given by:

$$S_{vg} = S_{vis,dir}(1 - \alpha_{vis,dir}) + S_{vis,dif}(1 - \alpha_{vis,dif}) + S_{nir,dir}(1 - \alpha_{nir,dir}) + S_{nir,dif}(1 - \alpha_{nir,dif}), \quad (S34)$$

225 where  $S$  on the right-hand side represents the incoming solar shortwave radiation flux across different spectral bands (visible, *vis*; near-infrared, *nir*) ( $\text{W m}^{-2}$ ) and radiation types (direct, *dir*; diffuse, *dif*) ( $\text{W m}^{-2}$ ), and the term  $\alpha$  is the albedo (-).

In the radiative transfer scheme,  $\alpha_{veg}$  is a function of the leaf albedo  $\omega$  (-), the Leaf Area Index  $LAI$  (-), the solar zenith angle  $\mu$  (-), and the leaf angle distribution factor  $\chi_L$  (-). Considering the canopy *nir* albedo, the albedo is defined as:

$$\alpha_{veg,nir} = f(w_{nir}, \mu, LAI, \chi_L), \quad (S35)$$

230 The albedo  $w_{nir}$  is defined as:

$$w_{nir} = \rho_{l,nir} + \tau_{l,nir}, \quad (S36)$$

where  $\rho_{l,nir}$  is the leaf reflectance (-) and  $\tau_{l,nir}$  is the leaf transmittance (-).

## References

- 235 Amenu, G. G. and Kumar, P.: A model for hydraulic redistribution incorporating coupled soil-root moisture transport, *Hydrol. Earth Syst. Sci.*, 12, 55-74, <https://doi.org/10.5194/hess-12-55-2008>, 2008.
- Dai, Y., Zhang, S., Yuan, H., and Wei, N.: Modeling Variably Saturated Flow in Stratified Soils With Explicit Tracking of Wetting Front and Water Table Locations, *Water Resour. Res.*, 55, 7939-7963, <https://doi.org/10.1029/2019wr025368>, 2019.
- 240 Ippisch, O., Vogel, H. J., and Bastian, P.: Validity limits for the van Genuchten–Mualem model and implications for parameter estimation and numerical simulation, *Adv. Water Resour.*, 29, 1780-1789, <https://doi.org/10.1016/j.advwatres.2005.12.011>, 2006.
- Kennedy, D., Swenson, S., Oleson, K. W., Lawrence, D. M., Fisher, R., Lola da Costa, A. C., and Gentine, P.: Implementing Plant Hydraulics in the Community Land Model, Version 5, *J. Adv. Model. Earth Syst.*, 11, 485-513, <https://doi.org/10.1029/2018MS001500>, 2019.
- 245 Lawrence, D. M., Fisher, R. A., Koven, C. D., Oleson, K. W., Swenson, S. C., Bonan, G., Collier, N., Ghimire, B., van Kampenhout, L., Kennedy, D., Kluzek, E., Lawrence, P. J., Li, F., Li, H., Lombardozzi, D., Riley, W. J., Sacks, W. J., Shi, M., Vertenstein, M., Wieder, W. R., Xu, C., Ali, A. A., Badger, A. M., Bisht, G., van den Broeke, M., Brunke, M. A., Burns, S. P., Buzan, J., Clark, M., Craig, A., Dahlin, K., Drewniak, B., Fisher, J. B., Flanner, M., Fox, A. M., Gentine, P., Hoffman, F., Keppel-Aleks, G., Knox, R., Kumar, S., Lenaerts, J., Leung, L. R., Lipscomb, W. H., Lu, Y., Pandey, A., Pelletier, J. D.,
- 250 Perket, J., Randerson, J. T., Ricciuto, D. M., Sanderson, B. M., Slater, A., Subin, Z. M., Tang, J., Thomas, R. Q., Martin, M. V., and Zeng, X.: The Community Land Model Version 5: Description of New Features, Benchmarking, and Impact of Forcing Uncertainty, *J. Adv. Model. Earth Syst.*, 11, 4245-4287, <https://doi.org/10.1029/2018ms001583>, 2019.
- Niu, G.-Y. and Yang, Z.-L.: Effects of Frozen Soil on Snowmelt Runoff and Soil Water Storage at a Continental Scale, *J. Hydrometeorol.*, 7, 937-952, <https://doi.org/10.1175/JHM538.1>, 2006.
- 255 Niu, G. Y., Yang, Z. L., Dickinson, R. E., and Gulden, L. E.: A simple TOPMODEL-based runoff parameterization (SIMTOP) for use in global climate models, *J. Geophys. Res.-Atmos.*, 110, <https://doi.org/10.1029/2005jd006111>, 2005.
- Schenk, H. J. and Jackson, R. B.: THE GLOBAL BIOGEOGRAPHY OF ROOTS, *Ecological Monographs*, 72, 311-328, [https://doi.org/10.1890/0012-9615\(2002\)072\[0311:TGBOR\]2.0.CO;2](https://doi.org/10.1890/0012-9615(2002)072[0311:TGBOR]2.0.CO;2), 2002.
- 260 van den Honert, T. H.: Water transport in plants as a catenary process, *Discussions of the Faraday Society*, 3, 146-153, <https://doi.org/10.1039/DF9480300146>, 1948.
- Zhu, S., Chen, H., Zhang, X., Wei, N., Shangguan, W., Yuan, H., Zhang, S., Wang, L., Zhou, L., and Dai, Y.: Incorporating root hydraulic redistribution and compensatory water uptake in the Common Land Model: Effects on site level and global land modeling, *J. Geophys. Res.-Atmos.*, 122, 7308-7322, <https://doi.org/10.1002/2016JD025744>, 2017.
